# Supplementary material for: Tracking sustainability in crop pest management in the United States using an eco-efficiency index
Source: Frontiers journal article supplement (doi:10.3389/finsc.2025.1582496), 2025-05-20
Supplement: Table_2.xlsx [file Table_2.xlsx]

## Sheet: Summary
S2. NASS Crop Production Data
Table 1. Comparison of crop groups in USGS/PNSP, Pest-Chemgrids and the presnet study using NASS.
Crop class	USGS/PNSP	PEST-CHEMGRIDS	Present Study NASS	Additional details
Dominant	Corn	Corn, *Corn FOR	Corn
Dominant	Soyabean	Soyabean	Soybean
Dominant	Wheat	Wheat	Wheat
Dominant	Cotton	Cotton	Cotton
Dominant	Rice	Rice	Rice
Dominant	Alfalfa	Alfalfa	Alfalfa
Aggregated Vegetable and fruit (VegFru)	Artichokes, Asparagus, Avocados, Beans Peas Vegetable, Beans (snap, bush, pole, string, Lima), Beets, Berries, Blueberries, **Broccoli, **Brussels sprouts, **Bulb crops, Cabbage, Caneberries, **Cantaloupes, Carrots, Cauliflower, **Celery, Chicory, **Cole crops, **Collards, Cranberries, Cucumbers, **Cucurbits, Currants, **Daikon, Dry beans peas, Eggplant, **Eggplant peppers, **Escarole and Endive,…	Artichokes, Asparagus, Avocados, *Peas, Beans, *Beans (string, broad, green), *Beets FOR, Berries, Blueberries, Cabbage, *Caneberries (Raspberries, Gooseberries), Carrots, Cauliflower, Chicory, Cranberries, Cucumbers, Currants, Eggplant, Garlic, Gingerroot, *Herbs (Spices NES), *Dry beans peas (Legumes NES, Lentil, Chickpea, Pigeonpea, Pulse NES, cowpea), Lettuce, Melons, Okra, *Onions (green and…	artichoke, aspragus, avacados***, beans (snap), broccoli, cabbage, cantaloupes, carrots, cauliflower, celery, corn (sweet), cucumbers, garlic, honeydews, lettuce (head, leaf, romaine), onions, pepeprs (bell), peppers (chile), pumpkin, spinach, squash, tomatoes, watermelons, strawberries, sweet potatoes, potatoes, dry beans peas (legumes, lentil, chickpea, pigeonpea, pulse, cowpea), berries**, cra…	From 1992 to 2015, vegetable totals were recorded as "Principal Vegetable", whereas, from 2016 to 2018 they were reported as "Principle Vegetable Fresh Market and Processing", nearly doubling the overall production total. No available data on the following crops in NASS that are included in the USGS crop list for Vegetables and Fruits: beets, chicory, currants, and eggplant. Incomplete data there…
	**19/58 = 0.327 (unmatched fraction) 0.673 (matched fraction)	*12/58 = 0.21 (partial match fraction) 0.79 (matched fraction)	*Vegetable totals measurement is recorded in "Principle Vegetable Fresh Market and Processing" for years 2016-2018 while 1992-2015 measured in "Principle Vegetable" - significantly increases overall total; ** all berries recorded together between 1992-1995, production categorized in the following years; *** no data for avocadoes for years 1997 or 2012
Aggregated Orchards and Grapes (OrcGra)	Almonds, Apples, Apricots, Cherries, Chestnuts, Citrus (other), Dates, Figs, Grapefruit, Grapes, **Grapevines, Hazelnuts, Kiwifruit, **Kumquats, Lemons, Limes, Mangoes, Nuts (trees and other), Olives, Oranges, Papayas, Peaches, Pears, **Pecans, Persimmons, Pistachios, Plums, **Pomelike fruit other, Prunes, Stone-like fruit other, **Tangelos and Tangerines, Walnuts	Almond, Apples, Apricot, Cherries, Chestnuts, *Citrus (other), Dates, Figs, Grapefruit, Grape, Hazelnuts, Kiwifruit, Lemons, Limes, Mangoes, *Nuts (Nutmeg, Brazil, Cashew, Groundnut, Nuts NES), Olives, Oranges, Papayas, Peaches, Pears, Persimmons, Pistachios, Plums, *Prunes (sour cherry), Stone-like fruits NES, Walnuts	apples, apricots, cherries (sweet and tart), dates (CA), figs (CA), grapes, kiwifruit, nectarines (CA), olives (CA), papayas (HI), peaches, pears, plums (CA), prunes (CA), prunes and plums, almonds, hazelnuts, macadamia, pecans, pistachios, walnuts, oranges, grapefruit, K-early citrus fruit, lemons, limes, oranges, tangelos, tangerines, temples, mandarins	No available data on the following crops in NASS that are included in the USGS crop list for “Orchard and Grapes”: chestnuts. Incomplete data therefore not included in analysis: mango, persimmons, certain nuts (brazil, nutmeg, cashew, groundnuts). Stone-like fruit data includes nectarines. Production only reported for California: dates, figs, nectarines, olives, plums, prunes Production only repo…
	**5/33 = 0.151 (unmatched fraction) 0.849 (matched fraction)	*3/33 = 0.091 (partial match fraction) 0.909 (matched fraction)
Aggregated Pasture and hay (PasHay)	Cropland for pasture, RPLongtermAcres, Fallow/FallowSummer, Forage/ Fodder, Hay other, Idle cropland other, Lots farmstead other, other Tame hay, Pastureland, Pasture Range, Pasture Rangeland other	Pasture, *Cabbage FOR, *Carrots FOR, *Forage NES, *Rye FOR, *Sorghum FOR, *Swede FOR, *Vegetable FOR, *Vetch	all hay excluding alfalfa
Aggregated Other crops (Other)	Barley, Field and grass seed crops all, Flax, **Flaxseed, Hops, **Jojoba harvested, Mustard (seed), Oats (for grain), Oats Rye, **Peanuts, Rye (for grain), Rapeseed (Canola), Safflower, Sesame, Sorghum, Sorghum Milo, Sugar (beets, Cane), Sunflowers, Taro, Tobacco, Triticale, **Wildrice, **Woodland, Other crops	Barley, *Field and grass seed crops all (Mixed Grass, Grass NES, Poppy, Hemp, Hempseed, Jute, Jute like fiber, Fibres NES, Kapok fiber, Fonio, Kapok seed, Linseed, Mixed Grain), Flax, hops, *Mustard, *Oats (Cereal NES, Millet, Lupin, Buckwheat), *Rye, *Rapeseed (Oilseed FOR, Oilseed NES), Safflower, Sesame, Sorghum, *Sugar (beets, Cane, Sugar NES), Sunflower, Taro, Tobacco, Triticale, *Other crop…	Barley, Canola, Flaxseed, Hops, Lentils, Millet, Mint, Mustard, Oats, Peanuts, Rapeseed, Rye, Safflower, Sunflower, Sugarbeets, Sugar Cane, Sunflower, Taro, Tobacco,
	**5/24 = 0.208 (unmatched fraction) 0.792 (matched fraction)	*7/24 = 0.291 (partial match fraction) 0.709 (matched fraction)

## Sheet: Crop Totals
Crop Group	Unit	1992	1993	1994	1995	1996	1997	1998	1999	2000	2001	2002	2003	2004	2005	2006	2007	2008	2009	2010	2011	2012	2013	2014	2015	2016	2017	2018
Corn	Metric tonnes	2.57918e+08	1.72488e+08	2.73535e+08	201399788	2.51273e+08	2.50573e+08	265592371	2.56664e+08	269848028	2.58622e+08	2.72304e+08	2.77125e+08	2.81945e+08	2.86766e+08	2.91586e+08	2.96407e+08	3.01227e+08	3.06048e+08	3.10868e+08	3.15689e+08	3.20509e+08	3.2533e+08	3.3015e+08	3.34971e+08	3.39791e+08	3.44612e+08	3.49432e+08
Soybean	Metric tonnes	5.96127e+07	5.08862e+07	6.84447e+07	5.91745e+07	6.47815e+07	73177020	7.45994e+07	7.22247e+07	7.50566e+07	7.86728e+07	8.14731e+07	8.39841e+07	8.6495e+07	8.90059e+07	9.15169e+07	9.40278e+07	9.65387e+07	9.90497e+07	1.01561e+08	1.04072e+08	1.06582e+08	1.09093e+08	1.11604e+08	1.14115e+08	1.16626e+08	1.19137e+08	1.21648e+08
Wheat	Metric tonnes	6.71364e+07	6.52215e+07	6.31678e+07	5.94046e+07	6.19814e+07	6.75356e+07	6.93279e+07	6.2476e+07	6.06416e+07	5.30019e+07	5.87426e+07	5.79705e+07	5.71983e+07	5.64262e+07	5.5654e+07	5.48819e+07	5.41097e+07	5.33376e+07	5.25654e+07	5.17933e+07	5.10211e+07	5.0249e+07	4.94768e+07	4.87047e+07	4.79325e+07	4.71604e+07	4.63882e+07
Cotton	Metric tonnes	3.53077e+06	3.51228e+06	4.28042e+06	3.89679e+06	4.12367e+06	4.09124e+06	3.02999e+06	3.69393e+06	3.74189e+06	4.41992e+06	3.9669e+06	3.99141e+06	4.01593e+06	4.04044e+06	4.06495e+06	4.08946e+06	4.11397e+06	4.13848e+06	4.16299e+06	4.18751e+06	4.21202e+06	4.23653e+06	4.26104e+06	4.28555e+06	4.31006e+06	4.33457e+06	4.35909e+06
Rice	Metric tonnes	9.12663e+06	7930388	1.00472e+07	8.83265e+06	8.71723e+06	9.29599e+06	9.3697e+06	1.04662e+07	9.6963e+06	10935716	1.05394e+07	1.0739e+07	1.09385e+07	1.11381e+07	1.13377e+07	1.15372e+07	1.17368e+07	1.19363e+07	1.21359e+07	1.23355e+07	1.2535e+07	1.27346e+07	1.29342e+07	1.31337e+07	1.33333e+07	1.35329e+07	1.37324e+07
Aggragted Pasture and Hay	Metric tonnes	8.27954e+06	7.19433e+06	9.11464e+06	8.01284e+06	7.90814e+06	8.43319e+06	8.50006e+06	9.49475e+06	8.79634e+06	9.92072e+06	9.56118e+06	9.74223e+06	9.92327e+06	1.01043e+07	1.02854e+07	1.04664e+07	1.06474e+07	1.08285e+07	1.10095e+07	1.11906e+07	1.13716e+07	1.15526e+07	1.17337e+07	1.19147e+07	1.20958e+07	1.22768e+07	1.24579e+07
Alfalfa	Metric tonnes	7.51107e+06	6.52659e+06	8.26867e+06	7.26913e+06	7.17415e+06	7.65046e+06	7.71112e+06	8.6135e+06	7.9799e+06	8.99993e+06	8.67376e+06	8.838e+06	9.00224e+06	9.16648e+06	9.33072e+06	9.49495e+06	9.65919e+06	9.82343e+06	9.98767e+06	1.01519e+07	1.03161e+07	1.04804e+07	1.06446e+07	1.08089e+07	1.09731e+07	1.11373e+07	1.13016e+07
Aggregated Vegetable and Fruit	Metric tonnes	4.32314e+07	4.3602e+07	4.70094e+07	4.62671e+07	4.95047e+07	4.90559e+07	4.90701e+07	5.1027e+07	3.08956e+07	4.81622e+07	4.52056e+07	4.50935e+07	4.49814e+07	4.48693e+07	4.47572e+07	4.46451e+07	4.4533e+07	4.44209e+07	4.43089e+07	4.41968e+07	4.40847e+07	4.39726e+07	4.38605e+07	4.37484e+07	4.36363e+07	4.35243e+07	4.34122e+07
Aggregated Orchard and Grapes	Metric tonnes	5.9022e+07	5.73229e+07	6.43928e+07	6.15491e+07	6.4587e+07	6.51396e+07	6.52813e+07	6.91353e+07	4.76718e+07	6.70828e+07	6.34405e+07	6.36737e+07	6.39069e+07	6.41401e+07	6.43733e+07	6.46065e+07	6.48397e+07	6.50729e+07	6.5306e+07	6.55392e+07	6.57724e+07	6.60056e+07	6.62388e+07	6.6472e+07	6.67052e+07	6.69384e+07	6.71716e+07
Aggregated Other Crops	Metric tonnes	95000000	81500000	90600000	80100000	86600000	87300000	90600000	91700000	88800000	80900000	86040000	8.58091e+07	8.55782e+07	8.53473e+07	8.51164e+07	8.48855e+07	8.46545e+07	8.44236e+07	8.41927e+07	8.39618e+07	8.37309e+07	83500000	8.32691e+07	8.30382e+07	8.28073e+07	8.25764e+07	8.23455e+07
Grand Total for All Crops	Metric tonnes	6.10368e+08	4.96184e+08	6.38861e+08	5.35906e+08	6.06651e+08	6.22252e+08	6.43082e+08	6.35495e+08	6.03128e+08	6.20718e+08	6.39947e+08	6.46966e+08	6.53985e+08	6.61004e+08	6.68022e+08	6.75041e+08	6.8206e+08	6.89079e+08	6.96098e+08	7.03117e+08	7.10135e+08	7.17154e+08	7.24173e+08	7.31192e+08	7.38211e+08	7.4523e+08	7.52248e+08

## Sheet: Corn
Year	Production (Bushels)	Production (Metric Tonnes)		Conversion Factor
1992	9476698000	2.57918e+08		bushels*0.027216
1993	6337730000	1.72488e+08
1994	10050520000	2.73535e+08
1995	7400051000	201399788
1996	9232557000	2.51273e+08
1997	9206832000	2.50573e+08
1998	9758685000	265592371
1999	9430612000	2.56664e+08
2000	9915051000	269848028
2001	9502580000	2.58622e+08
2002	8966787000	244040075
2003	10087292000	2.74536e+08
2004	11805581000	3.21301e+08
2005	11112187000	3.02429e+08
2006	10531123000	2.86615e+08
2007	13037875000	354838806
2008	12043203000	3.27768e+08
2009	13067156000	3.55636e+08
2010	12425330000	3.38168e+08
2011	12313956000	3.35137e+08
2012	10755111000	292711101
2013	13830704000	3.76416e+08
2014	14217292000	3.86938e+08
2015	13601964000	3.70191e+08
2016	15148038000	4.12269e+08
2017	14609407000	3.9761e+08
2018	14321674000	3.89779e+08

## Sheet: Soybean 
Year	Production (bushels)	Production (metric tonnes)	Conversion Factor
1992	2190354000	5.96127e+07	bushels*0.027216
1993	1869718000	5.08862e+07
1994	2514869000	6.84447e+07
1995	2174254000	5.91745e+07
1996	2380274000	6.47815e+07
1997	2688750000	73177020
1998	2741014000	7.45994e+07
1999	2653758000	7.22247e+07
2000	2757810000	7.50566e+07
2001	2890682000	7.86728e+07
2002	2756147000	7.50113e+07
2003	2453845000	6.67838e+07
2004	3123790000	8.50171e+07
2005	3068342000	8.3508e+07
2006	3196726000	8.70021e+07
2007	2677117000	7.28604e+07
2008	2967007000	8.07501e+07
2009	3360931000	9.14711e+07
2010	3331306000	9.06648e+07
2011	3097179000	8.42928e+07
2012	3042044000	8.27923e+07
2013	3357004000	9.13642e+07
2014	3928070000	1.06906e+08
2015	3926779000	1.06871e+08
2016	4296496000	1.16933e+08
2017	4411633000	1.20067e+08
2018	4428150000	1.20517e+08

## Sheet: Wheat
Year	Production (bushels)	Production (metric tonnes)	Conversion Factor
1992	2466798000	6.71364e+07	bushels*0.027216
1993	2396440000	6.52215e+07
1994	2320981000	6.31678e+07
1995	2182708000	5.94046e+07
1996	2277388000	6.19814e+07
1997	2481466000	6.75356e+07
1998	2547321000	6.93279e+07
1999	2295560000	6.2476e+07
2000	2228160000	6.06416e+07
2001	1947453000	5.30019e+07
2002	1605878000	4.37056e+07
2003	2344415000	6.38056e+07
2004	2156790000	5.86992e+07
2005	2103325000	5.72441e+07
2006	1808416000	4.92178e+07
2007	2051088000	5.58224e+07
2008	2511896000	6.83638e+07
2009	2208918000	6.01179e+07
2010	2163023000	5.88688e+07
2011	1993111000	5.42445e+07
2012	2252307000	6.12988e+07
2013	2134979000	5.81056e+07
2014	2026310000	5.51481e+07
2015	2061939000	5.61177e+07
2016	2308663000	6.28326e+07
2017	1740910000	4.73806e+07
2018	1885361000	5.1312e+07

## Sheet: Cotton 
Year	Production (480 lb bales)	Production (metric tonnes)	Conversion Factor
1992	16218500	3.53077e+06	480 lb bales * 0.2177
1993	16133600	3.51228e+06
1994	19662000	4.28042e+06
1995	17899800	3.89679e+06
1996	18942000	4.12367e+06
1997	18793000	4.09124e+06
1998	13918200	3.02999e+06
1999	16968000	3.69393e+06
2000	17188300	3.74189e+06
2001	20302800	4.41992e+06
2002	17208600	3.74631e+06
2003	18255200	3.97416e+06
2004	23250700	5.06168e+06
2005	23890200	5.2009e+06
2006	21587800	4.69966e+06
2007	19206900	4.18134e+06
2008	12825400	2.79209e+06
2009	12183000	2.65224e+06
2010	18101800	3.94076e+06
2011	15573200	3.39029e+06
2012	17313800	3.76921e+06
2013	12909200	2.81033e+06
2014	16319400	3.55273e+06
2015	12888000	2.80572e+06
2016	17169900	3.73789e+06
2017	20922500	4.55483e+06
2018	18367000	3.9985e+06

## Sheet: Rice
Year	Production (CWT)	Production (metric tonnes)	Conversion Factor
1992	179658000	9.12663e+06	CWT * 0.0508
1993	156110000	7930388
1994	197779000	1.00472e+07
1995	173871000	8.83265e+06
1996	171599000	8.71723e+06
1997	182992000	9.29599e+06
1998	184443000	9.3697e+06
1999	206027000	1.04662e+07
2000	190872000	9.6963e+06
2001	215270000	10935716
2002	210960000	10716768
2003	199897000	1.01548e+07
2004	232362000	1.1804e+07
2005	222833000	1.13199e+07
2006	194585000	9884918
2007	198388000	1.00781e+07
2008	203733000	1.03496e+07
2009	219850000	11168380
2010	243104000	1.23497e+07
2011	184941000	9.395e+06
2012	199939000	1.01569e+07
2013	189500000	9626600
2014	222215000	11288522
2015	193080000	9808464
2016	224145000	11386566
2017	178228000	9.05398e+06
2018	223761000	1.13671e+07

## Sheet: Alfalfa
Year	Production (tons)	Production (metric tonnes)	Conversion Factor
1992	79140000	7.17946e+07	tons * 0.907185
1993	80115000	7.26791e+07
1994	81130000	7.35999e+07
1995	84138000	7.63287e+07
1996	79139000	7.17937e+07
1997	78535000	7.12458e+07
1998	81992000	7.43819e+07
1999	84405000	7.65709e+07
2000	81520000	7.39537e+07
2001	80354000	7.28959e+07
2002	73014000	6.62372e+07
2003	76098000	6.9035e+07
2004	75375000	6.83791e+07
2005	75610000	6.85923e+07
2006	70548000	6.40001e+07
2007	69880000	6.33941e+07
2008	70180000	6.36662e+07
2009	71072000	6.44755e+07
2010	67977000	6.16677e+07
2011	64815000	5.87992e+07
2012	50600000	45903561
2013	57307000	5.19881e+07
2014	61487000	5.57801e+07
2015	59060000	5.35783e+07
2016	58601000	5.31619e+07
2017	55812000	5.06318e+07
2018	52634000	4.77488e+07

## Sheet: Aggregated Pasture and Hay
Year	Production (tons)	Production (metric tonnes)	Conversion Factor
1992	67763000	6.14736e+07	tons * 0.907185
1993	66584000	6.0404e+07
1994	69006000	6.26012e+07
1995	70101000	6.35946e+07
1996	70640000	6.40835e+07
1997	74001000	6.71326e+07
1998	69395000	6.29541e+07
1999	75177000	6.81994e+07
2000	72083000	6.53926e+07
2001	76062000	6.90023e+07
2002	76453000	6.9357e+07
2003	81292000	7.37469e+07
2004	82747000	7.50668e+07
2005	74851000	6.79037e+07
2006	70235000	6.37161e+07
2007	77021000	6.98723e+07
2008	76090000	6.90277e+07
2009	76628000	6.95158e+07
2010	77023000	6.98741e+07
2011	65065000	5.9026e+07
2012	66472000	6.03024e+07
2013	77891000	7.06615e+07
2014	78632000	7.13338e+07
2015	75608000	6.85904e+07
2016	75481000	6.84752e+07
2017	72395000	6.56757e+07
2018	70045000	6.35438e+07

## Sheet: Aggregated Vegetable and Fruit
Data Source	NASS Non-Citrus Fruits and Nuts Summary	NASS Non-Citrus Fruits and Nuts Summary	NASS Non-Citrus Fruits and Nuts Summary	NASS Non-Citrus Fruits and Nuts Summary *only raspberry data available	NASS Non-Citrus Fruits and Nuts Summary	NASS Quick Stats (see intructions below)	NASS Quick Stats (see instructions below)	NASS Vegetable Summaries	NASS Quick Stats (see instructions below)	NASS Vegetable Summaries
Crop	avocados	berries	blueberries	caneberries (raspberries, gooseberries)	cranberries	beans, dry edible (incl chickpeas)	potatoes	strawberries	sweet potatoes	vegetable sums	Aggregated vegetable and fruit total
Unit	metric tonnes	metric tonnes	metric tonnes	metric tonnes	metric tonnes	metric tonnes	metric tonnes	metric tonnes	metric tonnes	metric tonnes	metric tonnes
1992	264535	1807.11	-	-	188694	1148842	2.16086e+07	596565	609854	1.88125e+07	4.32314e+07
1993	130362	1808.02	-	-	177808	1.11059e+06	2.17776e+07	656621	560172	1.91871e+07	4.3602e+07
1994	394898	1808.93	-	-	205477	1470660	2.37705e+07	737632	679704	2.01436e+07	4.70094e+07
1995	789795	1809.83	-	-	190237	1.559e+06	2.2611e+07	729467	651307	1.97344e+07	4.62671e+07
1996	171186	1810.74	-	-	211918	1.41793e+06	2.53621e+07	738267	671373	20930108	4.95047e+07
1997	-	1811.65	-	-	249022	1491996	2.37282e+07	740807	677012	2.2167e+07	4.90559e+07
1998	144515	-	97976	43998.5	246936	1.54523e+06	2.41692e+07	857555	628142	2.13366e+07	4.90701e+07
1999	166287	-	110677	49350.9	286670	1.68382e+06	2.42934e+07	919683	620827	22896322	5.1027e+07
2000	212553	-	134263	50802.4	255917	1.34838e+06	2.60919e+07	938581	700024	1.16313e+06	3.08956e+07
2001	202574	-	121563	51981.7	241765	996188	2.22447e+07	839368	737362	22726650	4.81622e+07
2002	180893	-	115394	51709.5	258094	1.53985e+06	2.33579e+07	957885	650189	2.25462e+07	4.96582e+07
2003	197222	-	122924	48534.4	280502	1.14259e+06	2.3257e+07	1.05796e+06	807263	2.26158e+07	4.95298e+07
2004	162749	-	124647	71939.8	280139	901344	2.31669e+07	1.12461e+06	818490	2.43593e+07	5.10101e+07
2005	283405	-	135533	82826	283223	1.35006e+06	2.15354e+07	1.17963e+06	799084	2.39821e+07	4.96313e+07
2006	135533	-	159030	83461	312979	1227074	2.23875e+07	1221232	833171	2.36981e+07	5.00581e+07
2007	175177	-	165289	64773	297285	1.29977e+06	22599650	1.24221e+06	917956	2.33386e+07	5.01007e+07
2008	105233	-	199127	67857.4	356796	1.29835e+06	21084794	1.2861e+06	936904	2.26905e+07	4.80257e+07
2009	243761	-	206838	80376.6	313614	1.29169e+06	2.19761e+07	1.42306e+06	989025	2.25169e+07	4.90414e+07
2010	158122	-	226615	67585.3	308806	1.61549e+06	2.05371e+07	1.44943e+06	1211326	2.24392e+07	4.78555e+07
2011	205477	-	234417	85547.5	349811	1010412	2.18261e+07	1475232	1.36977e+06	2.19607e+07	4.85174e+07
2012	-	-	253558	76475.7	364961	1621790	2.35085e+07	1.53157e+06	1.34529e+06	2.22399e+07	5.0942e+07
2013	166106	-	286398	83279.6	406328	1.248e+06	2.20803e+07	1550416	1.25725e+06	2.12349e+07	4.81469e+07
2014	179169	-	308715	104871	381018	1468628	22462236	1547876	1.49677e+06	2.07825e+07	4.87318e+07
2015	207745	-	302909	132903	388457	1.5269e+06	22413214	1.53528e+06	1.57561e+06	2.03221e+07	4.84051e+07
2016	124829	-	315428	122470	436719	1.45811e+06	2.24237e+07	1.60583e+06	1.60254e+06	6.79549e+07	9.60446e+07
2017	132721	-	267347	106141	379748	1.82682e+06	2.29068e+07	1.62517e+06	1.81082e+06	6.65241e+07	9.55797e+07
2018	168528	-	300777	99246	404877	1.89266e+06	22861016	96146.9	1.3908e+06	6.68118e+07	9.38573e+07

[truncated: 2 more sheets: Aggregated Orchard and Grapes, Aggregated Other Crops]
